# Supplementary material for: Aquatic photolysis of strobilurin fungicide kresoxim-methyl: kinetics, pathways, and effects of adjuvants
Source: Royal Society of Chemistry journal article supplement (doi:10.1039/d3nj05471c), 2024-01-01
Supplement: d3nj05471c1.pdf [file d3nj05471c1.pdf]

## Supplementary Information

### Aquatic photolysis of strobilurin fungicide kresoxim-methyl: kinetics, pathways, and effects of adjuvants

Xuewei Zhang,<sup>a</sup> Jing Ye,<sup>a</sup> Zhigang Ni,<sup>b</sup> Xuerui Yang,<sup>a\*</sup> Yuefei Ji,<sup>c</sup> Jean-Marc Chovelon,<sup>d</sup>

Guangli Xiu<sup>a,e</sup> and Lei Zhou<sup>a,e\*</sup>

<sup>a</sup>State Environmental Protection Key Lab of Environmental Risk Assessment and Control on Chemical Processes, School of Resources & Environmental Engineering, East China University of Science and Technology, Shanghai 200237, China

<sup>b</sup>College of Material, Chemistry and Chemical Engineering, Key Laboratory of Organosilicon Chemistry and Material Technology of Ministry of Education, Hangzhou Normal University, Hangzhou 311121, China

<sup>c</sup>College of Resources and Environmental Sciences, Nanjing Agricultural University, Nanjing 210095, China

<sup>d</sup>Univ Lyon, Université Claude Bernard Lyon 1, CNRS, IRCELYON, F-69626, 2 Avenue Albert Einstein, Villeurbanne, France

<sup>e</sup>Shanghai Institute of Pollution Control and Ecological Security, Shanghai 200092, China

\* Corresponding author.

E-mail addresses: yangxuerui@ecust.edu.cn (Xuerui Yang); zhoulei@ecust.edu.cn (Lei Zhou).

#### Text. S1. SPE method

After the SPE activation with ultrapure water (20 mL) and conditioning with methanol (10 mL), 50 mL of sample was loaded and the eluate was recovered (fraction A). The SPE Column was washed with 1 mL acetonitrile (ACN). The sample was re-dissolved in 1 mL acetonitrile corresponding to a concentration fold of 50.

#### Text. S2. Reactive intermediates identification

Reactive intermediates were explored using electron paramagnetic resonance spectroscopy analysis (EPR). In this study, 5,5-dimethyl-1-pyrrolidine N-oxide (DMPO) and 2,2,6,6-tetramethyl-4-piperidinol (TEMP) were chosen as spin trapping agents for •OH and <sup>1</sup>O<sub>2</sub>, respectively. In each case, the spin trapping agent (0.1 M) was added to the photolytic solutions containing KM. After mixing, samples were taken

into capillaries and inserted into EPR chambers for testing. The instrumental parameters used for sample analysis were as follows: modulation frequency of 100.00 kHz; microwave power of 6.420 mW; microwave frequency of 9.889 GHz; sweep width of 200 G; central field of 3520 G.

**Text. S3. Second order rate constant ( $k_{1O_2, KM}$ ) detection**

The second-order rate constants of KM with  $^1O_2$  was determined by completion kinetics method according to the following equation. Rose Bengal (RB, 1  $\mu$ M) was selected as sensitizer of  $^1O_2$ . Furfuryl alcohol (FFA, 10  $\mu$ M), with a known rate constant with  $^1O_2$ , ( $1.2 \times 10^8$  L M<sup>-1</sup> s<sup>-1</sup>) was used as a reference chemical in this study. The reaction between FFA and  $^1O_2$  was nearly diffusion controlled with 1:1 stoichiometry. During the irradiation, the loss of KM was monitored along with the loss of FFA.

$$k_{1O_2, KM} = \frac{\ln [KM_t / KM_0]}{\ln [FFA_t / FFA_0]} \times k_{1O_2, FFA} \quad (1)$$

Table. S1. HPLC conditions of three compounds

| Chemicals                      | H <sub>2</sub> O | Methanol | 0.1%                           |                    | Flow rate<br>(mL/min) | Wavelen-<br>-gth (nm) | Retention<br>time (min) |
|--------------------------------|------------------|----------|--------------------------------|--------------------|-----------------------|-----------------------|-------------------------|
|                                |                  |          | ortho-<br>phospho-<br>ric acid | Acetoni-<br>-trile |                       |                       |                         |
| KM                             | 0                | 0        | 30                             | 70                 | 1.0                   | 230                   | 8.60                    |
| <i>Para</i> -nitr-<br>oanisole | 0                | 35       | 65                             | 0                  | 1.0                   | 265                   | 5.40                    |
| Furfuryl<br>alcohol            | 0                | 0        | 20                             | 80                 | 1.0                   | 270                   | 7.10                    |

Table. S2. The water quality parameters of Zixia Lake in this study.

|            | TOC<br>(mg/L as C) | Alkalinity<br>(mg/L as CaCO <sub>3</sub> ) | NO <sub>3</sub><br>(mg/L) | Absorbance<br>/UV254nm (1/cm) | pH  |
|------------|--------------------|--------------------------------------------|---------------------------|-------------------------------|-----|
| Zixia Lake | 12.78 ± 0.02       | 57.6                                       | 1.27                      | 0.028                         | 7.9 |

Table. S3. Major intermediate photoproducts identified in the photodegradation of KM.

| Label         | RT<br>(min)                              | Measure<br>d exact<br>mass<br>[M+H] <sup>+</sup> | Theoreti-<br>-cal exact<br>mass<br>[M+H] <sup>+</sup> | $\Delta$ ppm | Formula<br>of neutral<br>structure              | Propose structure |
|---------------|------------------------------------------|--------------------------------------------------|-------------------------------------------------------|--------------|-------------------------------------------------|-------------------|
| KM            | 3.19                                     | 314.1385                                         | 314.1387                                              | -0.524       | C <sub>18</sub> H <sub>19</sub> NO <sub>4</sub> |                   |
| KM<br>isomers | 1.60;<br>2.05;<br>2.17;<br>2.96;<br>6.05 | 314.1385                                         | 314.1387                                              | -0.683       | C <sub>18</sub> H <sub>19</sub> NO <sub>4</sub> |                   |
| TP1           | 1.04                                     | 300.1233                                         | 300.1230                                              | 0.951        | C <sub>17</sub> H <sub>17</sub> NO <sub>4</sub> |                   |
| TP2           | 1.55                                     | 286.1077                                         | 286.1074                                              | 1.313        | C <sub>16</sub> H <sub>15</sub> NO <sub>4</sub> |                   |
| TP3           | 1.44                                     | 238.1228                                         | 238.1226                                              | 1.257        | C <sub>16</sub> H <sub>15</sub> NO              |                   |
| TP4           | 1.14                                     | 346.1290                                         | 346.1285                                              | 1.578        | C <sub>18</sub> H <sub>19</sub> NO <sub>6</sub> |                   |

|      |      |          |          |       |                                                 |                                                                                       |
|------|------|----------|----------|-------|-------------------------------------------------|---------------------------------------------------------------------------------------|
| TP5  | 1.30 | 344.1132 | 344.1129 | 1.035 | C <sub>18</sub> H <sub>17</sub> NO <sub>6</sub> | 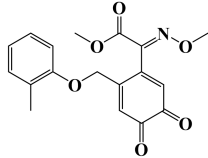   |
| TP6  | 1.72 | 346.1288 | 346.1285 | 0.856 | C <sub>18</sub> H <sub>19</sub> NO <sub>6</sub> |    |
| TP7  | 0.85 | 332.1133 | 332.1129 | 1.344 | C <sub>17</sub> H <sub>17</sub> NO <sub>6</sub> |    |
| TP8  | 0.92 | 318.0977 | 318.0972 | 0.446 | C <sub>16</sub> H <sub>16</sub> NO <sub>6</sub> |    |
| TP9  | 1.85 | 332.1497 | 332.1492 | 1.327 | C <sub>18</sub> H <sub>21</sub> NO <sub>5</sub> |   |
| TP10 | 0.58 | 284.1284 | 284.1281 | 0.845 | C <sub>17</sub> H <sub>17</sub> NO <sub>3</sub> |  |
| TP11 | 2.43 | 192.0658 | 192.0655 | 1.668 | C <sub>10</sub> H <sub>9</sub> NO <sub>3</sub>  |  |
| TP12 | 1.27 | 208.0609 | 208.0605 | 1.998 | C <sub>10</sub> H <sub>9</sub> NO <sub>4</sub>  |  |

---

Table. S4. The acute toxicity (LC50/EC50) and chronic toxicity (ChV) parameters towards aquatic organisms of the photoproducts

| Label          | LC <sub>50</sub> (mg L <sup>-1</sup> ) |                  | EC <sub>50</sub><br>(mg L <sup>-1</sup> )<br>Green<br>Algae /<br>96h | ChV (mg L <sup>-1</sup> ) |                  |                         | Class            |
|----------------|----------------------------------------|------------------|----------------------------------------------------------------------|---------------------------|------------------|-------------------------|------------------|
|                | Fish /<br>96h                          | Daphnia /<br>48h |                                                                      | Fish /<br>96h             | Daphnia /<br>48h | Green<br>Algae /<br>96h |                  |
| KM and isomers | 0.170                                  | 0.032            | 0.011                                                                | 0.0025                    | 0.0041           | 0.0049                  | Aliphatic Amines |
| TP1            | 0.251                                  | 0.045            | 0.016                                                                | 0.0041                    | 0.0056           | 0.0073                  | Aliphatic Amines |
| TP2            | 0.23                                   | 0.042            | 0.015                                                                | 0.0037                    | 0.0052           | 0.0067                  | Aliphatic Amines |
| TP3            | 1.46                                   | 1.03             | 1.9                                                                  | 0.185                     | 0.185            | 0.808                   | Neutral Organics |
| TP4            | 0.801                                  | 0.134            | 0.057                                                                | 0.017                     | 0.015            | 0.024                   | Aliphatic Amines |
| TP5            | 13.4                                   | 1.81             | 1.17                                                                 | 0.536                     | 0.168            | 0.424                   | Aliphatic Amines |
| TP6            | 5.34                                   | 0.772            | 0.434                                                                | 0.172                     | 0.077            | 0.166                   | Aliphatic Amines |
| TP7            | 1.19                                   | 0.192            | 0.086                                                                | 0.027                     | 0.021            | 0.036                   | Aliphatic Amines |
| TP8            | 1.09                                   | 0.178            | 0.08                                                                 | 0.025                     | 0.02             | 0.033                   | Aliphatic Amines |
| TP9            | 35.9                                   | 4.48             | 3.39                                                                 | 1.83                      | 0.384            | 1.16                    | Aliphatic Amines |
| TP10           | 44.8                                   | 27.4             | 27.6                                                                 | 4.77                      | 3.28             | 8.53                    | Neutral Organics |
| TP11           | 86.3                                   | 93.7             | 45                                                                   | 30.3                      | 0.742            | 13.3                    | Aliphatic Amines |
| TP12           | 2.38E-07                               | 0.0000106        | 0.000503                                                             | 0.000174                  | 0.00837          | 0.00293                 | Aliphatic Amines |

Table. S5. The criteria of acute toxicity (LC50/EC50) and chronic toxicity (ChV) (mg/L).

| Acute toxicity                               | Chronic toxicity | Toxicity level |
|----------------------------------------------|------------------|----------------|
| $LC_{50} > 100$ or $EC_{50} > 100$           | $ChV > 10$       | Not harmful    |
| $10 < LC_{50} < 100$ or $10 < EC_{50} < 100$ | $1 < ChV < 10$   | Harmful        |
| $1 < LC_{50} < 10$ or $1 < EC_{50} < 10$     | $0.1 < ChV < 1$  | Toxic          |
| $LC_{50} < 1$ or $EC_{50} < 1$               | $ChV < 0.1$      | Highly toxic   |

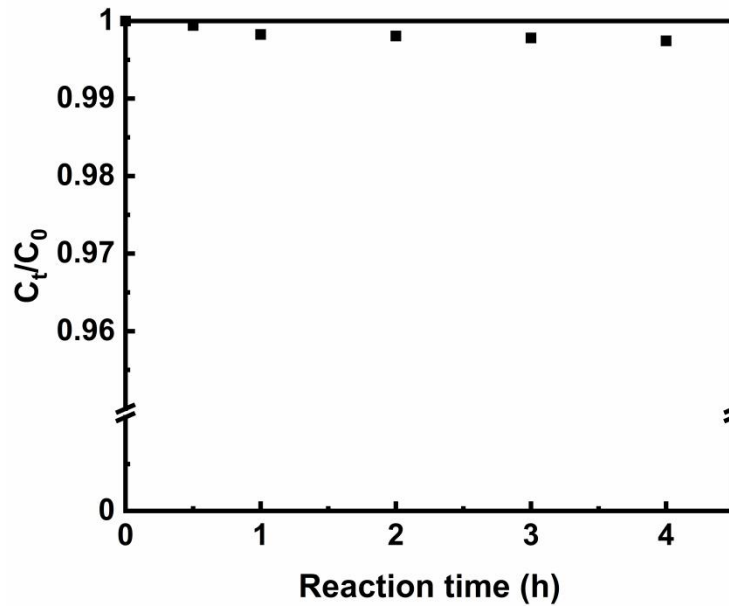

Fig. S1. Dark control experiments of KM in water ( $[KM] = 10 \mu\text{M}$ ,  $[\text{phosphate buffer}] = 10 \text{ mM}$ ).

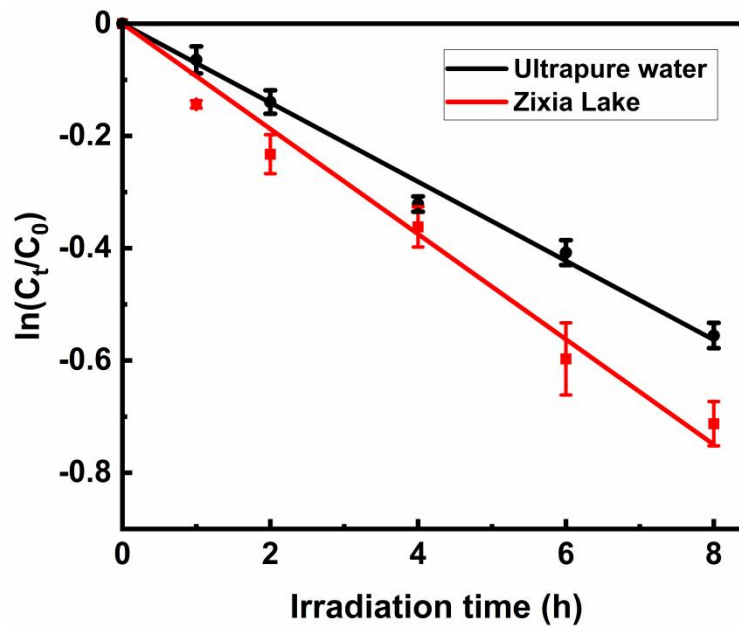

Fig. S2 The photolysis of the KM in natural water and ultrapure water.

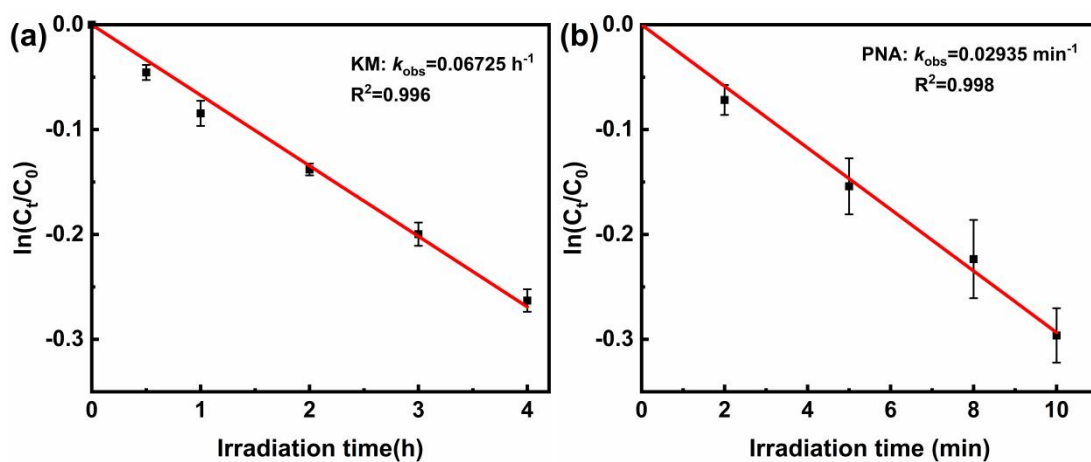

Fig. S3. (a) Photolysis rate constant of actinometer p-nitroanisole (PNA) in the presence of pyridine (pyr) ( $[PNA]_0 = 10 \mu\text{M}$ ,  $[pyr]_0 = 10 \text{mM}$ ); (b) Photodegradation rate constants of KM ( $[KM]_0 = 10 \mu\text{M}$ ,  $[\text{phosphate buffer}] = 10 \text{mM}$ ).

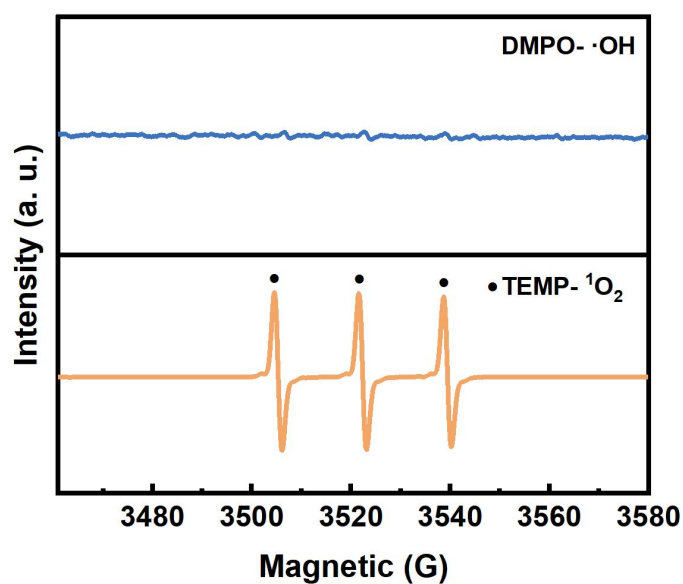

Fig. S4. EPR spectra for the identification of  $\bullet\text{OH}$  and  $^1\text{O}_2$  in KM photolysis ( $[KM]_0 = 100 \mu\text{M}$ ).



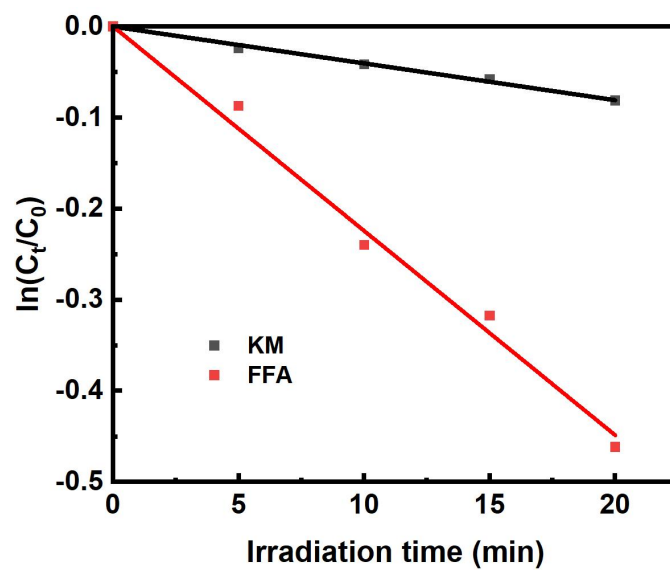

Fig. S5. Measurement of the second-order rate constant ( $k_{1_{O_2}, KM}$ ) for the reaction of KM with  $^1O_2$ .

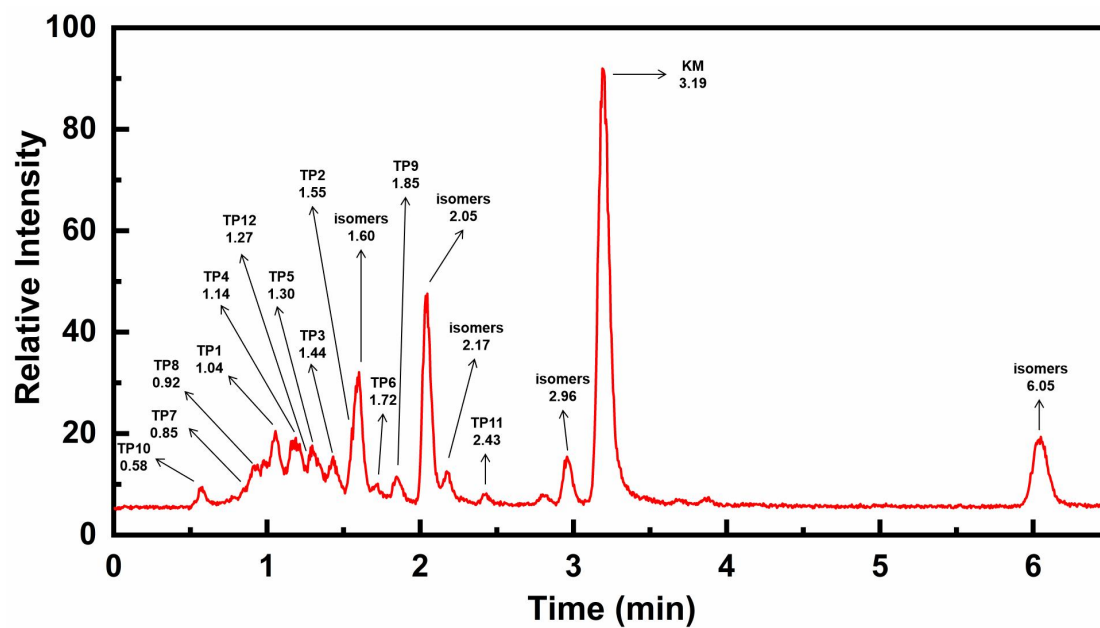

Fig. S6. HR-MS total ion chromatogram (TICs) of KM and some major products in positive mode.

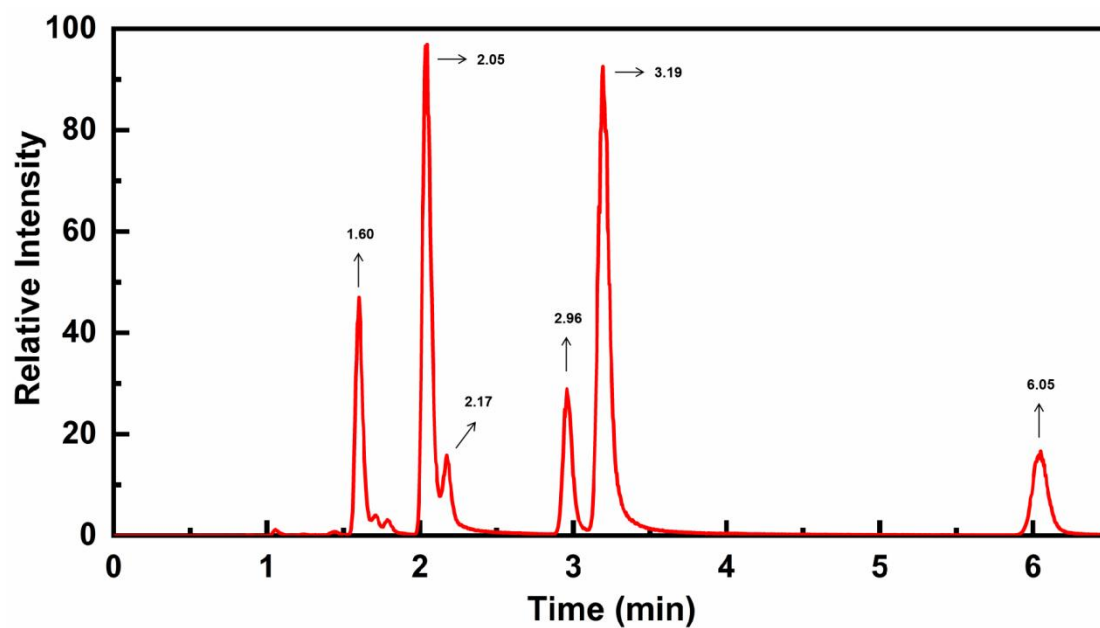

Fig. S7. Extracted diagnostic ion chromatogram at  $m/z$  314.1387 at 10 h under simulated sunlight.

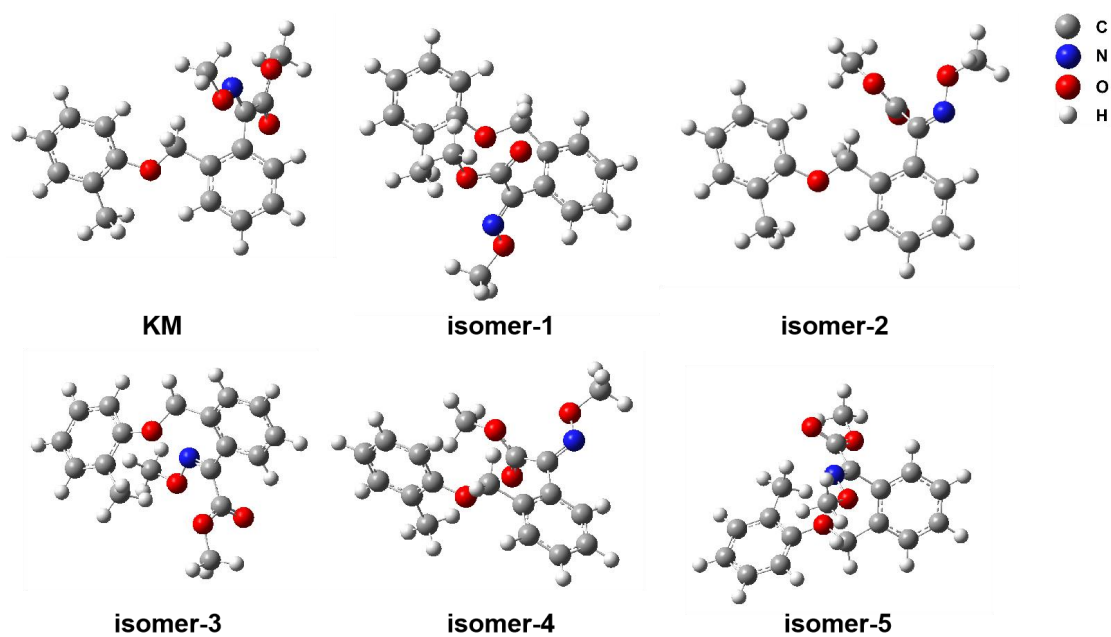

Fig. S8. The speculative three-dimensional structure of the KM and isomers.

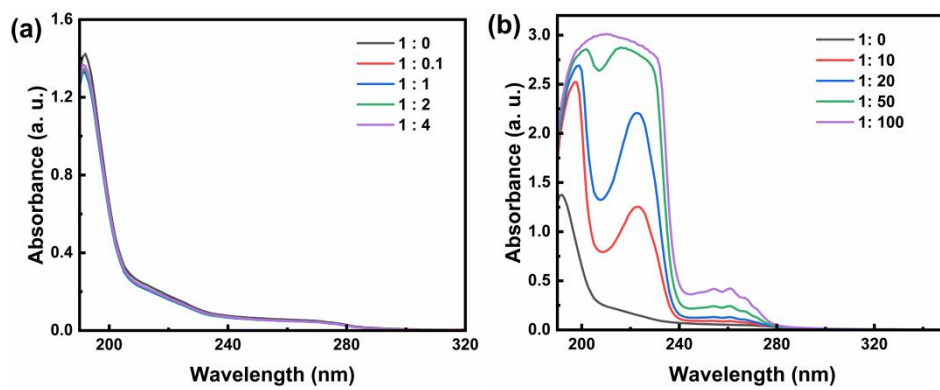

Fig. S9. (a) UV absorption spectrum at different ratios of KM to Tween 20; (b) UV absorption spectrum at different ratios of KM to SDBS.
